# Supplementary material
Source: PubMed Central journal article supplement (PMC3737771)
Supplement: NIHMS487501-supplement-supplement_1.pdf [file NIHMS487501-supplement-supplement_1.pdf]

## eAppendix 2

### Maximizing Comparability among Measures: Changes to Scoring Algorithms for Testing our Results<sup>1</sup>

| Disorder                | Measures                    | Differences Between Measures                                                                                                                                                                                                                                                                                                                                                                                                                                                                                                                                                                                                                                                                                                                                                                                                        | Changes to Scoring Algorithms <sup>1</sup>                                                                                                                                                                          |
|-------------------------|-----------------------------|-------------------------------------------------------------------------------------------------------------------------------------------------------------------------------------------------------------------------------------------------------------------------------------------------------------------------------------------------------------------------------------------------------------------------------------------------------------------------------------------------------------------------------------------------------------------------------------------------------------------------------------------------------------------------------------------------------------------------------------------------------------------------------------------------------------------------------------|---------------------------------------------------------------------------------------------------------------------------------------------------------------------------------------------------------------------|
| <b>Major Depression</b> | <b>DISC 2.3 and DISC-IV</b> | <ul style="list-style-type: none"> <li>• The DISC-IV includes an additional criterion:               <ul style="list-style-type: none"> <li>➤ Criterion E: The symptoms are not better accounted for by bereavement</li> </ul> </li> <li>• The DISC-IV includes an impairment criterion</li> <li>• The DISC 2.3 assesses past 6-month disorder and the DISC-IV assesses past year disorder</li> </ul>                                                                                                                                                                                                                                                                                                                                                                                                                               | <ul style="list-style-type: none"> <li>• Disabled Criterion E (bereavement) in the DISC-IV</li> <li>• Comparisons were made without impairment</li> <li>• Unable to adjust for differences in time frame</li> </ul> |
| <b>Dysthymia</b>        | <b>DISC 2.3 and DISC-IV</b> | <ul style="list-style-type: none"> <li>• The DISC-IV includes 2 additional criteria:               <ul style="list-style-type: none"> <li>➤ Criterion C: During the 2-year period (1 year for children and adolescents) of the disturbance, the person has never been without the symptoms in Criteria A and B for more than 2 months at a time</li> <li>➤ Criterion D: No major depressive episode has been present during the first 2 years of the disturbance (1 year for children and adolescents), i.e., the disturbance is not better accounted for by chronic major depressive disorder, or major depressive disorder in partial remission</li> </ul> </li> <li>• The DISC-IV includes an impairment criterion</li> <li>• The DISC 2.3 assesses past 6-month disorder and the DISC-IV assesses past year disorder</li> </ul> | <ul style="list-style-type: none"> <li>• Disabled Criteria C and D in the DISC-IV</li> <li>• Comparisons were made without impairment</li> <li>• Unable to adjust for differences in timeframe</li> </ul>           |

<sup>1</sup> We created a set of adjusted scoring algorithms to maximize comparability among the DISC 2.3, DISC-IV, and DIS-IV criteria, while minimizing alterations. All analyses were run twice, with and without these adjusted criteria. Because there were no substantive differences in findings and to enable comparisons with other studies, we present results using the original, unadjusted diagnoses.

| Disorder                            | Measures                    | Differences Between Measures                                                                                                                                                                                                                                                                                                                                                                                                                                                                                                                                                                                                                                   | Changes to Scoring Algorithms <sup>1</sup>                                                                                                                                                                                                                                                                                                          |
|-------------------------------------|-----------------------------|----------------------------------------------------------------------------------------------------------------------------------------------------------------------------------------------------------------------------------------------------------------------------------------------------------------------------------------------------------------------------------------------------------------------------------------------------------------------------------------------------------------------------------------------------------------------------------------------------------------------------------------------------------------|-----------------------------------------------------------------------------------------------------------------------------------------------------------------------------------------------------------------------------------------------------------------------------------------------------------------------------------------------------|
| <b>Mania</b>                        | <b>DISC 2.3 and DISC-IV</b> | <ul style="list-style-type: none"> <li>• The DISC-IV includes an additional symptom under Criterion A: mood lasts at least 1 week (or any duration if hospitalization is necessary)</li> <li>• Both measures include some impairment symptoms; however, the DISC-IV includes additional impairment symptoms</li> <li>• The DISC 2.3 assesses past 6-month disorder and the DISC-IV assesses past year disorder</li> </ul>                                                                                                                                                                                                                                      | <ul style="list-style-type: none"> <li>• Disabled the additional mood duration symptom in Criterion A in the DISC-IV</li> <li>• Comparisons were made without impairment</li> <li>• Unable to adjust for differences in timeframe</li> </ul>                                                                                                        |
| <b>Hypomania</b>                    | <b>DISC 2.3 and DISC-IV</b> | <ul style="list-style-type: none"> <li>• The DISC-IV includes 2 additional criteria: <ul style="list-style-type: none"> <li>➤ An additional symptom under Criterion A: mood lasts throughout at least 4 days</li> <li>➤ Criterion C: The episode is associated with an unequivocal change in functioning that is uncharacteristic of the person when not symptomatic</li> </ul> </li> <li>• The DISC 2.3 includes an impairment criterion</li> <li>• The DISC 2.3 assesses past 6-month disorder and the DISC-IV assesses past year disorder</li> </ul>                                                                                                        | <ul style="list-style-type: none"> <li>• Disabled the additional mood duration symptom in Criterion A and disabled Criterion C in the DISC-IV</li> <li>• Comparisons were made without impairment</li> <li>• Unable to adjust for differences in timeframe</li> </ul>                                                                               |
| <b>Generalized Anxiety Disorder</b> | <b>DISC 2.3 and DISC-IV</b> | <ul style="list-style-type: none"> <li>• The DISC 2.3 requires 6 of 18 symptoms; the DISC-IV requires 3 of 6 symptoms. [One of the symptoms in the DISC-IV (restlessness or feeling keyed up or on edge) is equivalent to two of the symptoms in the DISC 2.3 (restlessness, feeling keyed up or on edge)]</li> <li>• The DISC-IV includes an additional criterion: <ul style="list-style-type: none"> <li>➤ Criterion B: The person finds it difficult to control the worry</li> </ul> </li> <li>• The DISC-IV includes an impairment criterion</li> <li>• The DISC 2.3 assesses past 6-month disorder and the DISC-IV assesses past year disorder</li> </ul> | <ul style="list-style-type: none"> <li>• Modified Criterion D in DISC 2.3 to require 3 of 7 symptoms (the same symptoms named in the DISC-IV)</li> <li>• Disabled Criterion B (difficulty controlling worry) in the DISC-IV</li> <li>• Comparisons were made without impairment</li> <li>• Unable to adjust for differences in timeframe</li> </ul> |

| Disorder                | Measures                    | Differences Between Measures                                                                                                                                                                                                                                                                                                                                                                                                                                                                                                                                                                                                                                                                                                                                                                                                                                                     | Changes to Scoring Algorithms <sup>1</sup>                                                                                                                                                                                                                                                                                                                                                                                                                                                   |
|-------------------------|-----------------------------|----------------------------------------------------------------------------------------------------------------------------------------------------------------------------------------------------------------------------------------------------------------------------------------------------------------------------------------------------------------------------------------------------------------------------------------------------------------------------------------------------------------------------------------------------------------------------------------------------------------------------------------------------------------------------------------------------------------------------------------------------------------------------------------------------------------------------------------------------------------------------------|----------------------------------------------------------------------------------------------------------------------------------------------------------------------------------------------------------------------------------------------------------------------------------------------------------------------------------------------------------------------------------------------------------------------------------------------------------------------------------------------|
| <b>Panic Disorder</b>   | <b>DISC 2.3 and DISC-IV</b> | <ul style="list-style-type: none"> <li>• The DISC-IV includes an additional criterion: <ul style="list-style-type: none"> <li>➤ Criterion B: Absence of agoraphobia</li> </ul> </li> <li>• The DISC 2.3 requires either 4 attacks in a 4-week period <i>OR</i> 1 or more attacks followed by at least a month of fear. The DISC-IV requires both recurrent unexpected attacks <i>AND</i> 1 or more attacks followed by at least a month of fear</li> <li>• The DISC-IV includes two additional symptoms in addition to fear about having additional attacks (Criterion A, part 2): worry about the implications of the attack or its consequences; a significant change in behavior related to the attacks</li> <li>• The DISC-IV includes an impairment criterion</li> <li>• The DISC 2.3 assesses past 6-month disorder and the DISC-IV assesses past year disorder</li> </ul> | <ul style="list-style-type: none"> <li>• Disabled Criterion B in the DISC IV</li> <li>• Modified Criterion B in the DISC 2.3 to require 4 attacks in a 4-week period <i>AND</i> 1 or more attacks followed by a period of at least a month of persistent fear of having another attack</li> <li>• Ignored 2 additional symptoms in the DISC-IV (Criterion A, part 2)</li> <li>• Comparisons were made without impairment</li> <li>• Unable to adjust for differences in timeframe</li> </ul> |
| <b>Conduct Disorder</b> | <b>DISC 2.3 and DISC-IV</b> | <ul style="list-style-type: none"> <li>• The DISC-IV includes 2 additional symptoms in Criterion A: often bullies, threatens, or intimidates others; often stays out at night despite parental prohibitions, beginning before age 13</li> <li>• The DISC-IV includes an impairment criterion</li> <li>• The DISC 2.3 assesses past 6-month disorder and the DISC-IV assess past year disorder</li> <li>• There are some wording differences between the DISC 2.3 and the DISC-IV</li> </ul>                                                                                                                                                                                                                                                                                                                                                                                      | <ul style="list-style-type: none"> <li>• Ignored 2 additional symptoms (bullying and staying out at night) in Criterion A in the DISC-IV</li> <li>• Comparisons were made without impairment</li> <li>• Unable to adjust for differences in timeframe</li> <li>• Unable to adjust for differences in wording</li> </ul>                                                                                                                                                                      |

| Disorder                  | Measures                   | Differences Between Measures                                                                                                                                                                                                                                                                                                                                                                                                                                                                                                                                                                                                                                                                                                                                     | Changes to Scoring Algorithms <sup>1</sup>                                                                                                                                                                                                                                                                                                                                                            |
|---------------------------|----------------------------|------------------------------------------------------------------------------------------------------------------------------------------------------------------------------------------------------------------------------------------------------------------------------------------------------------------------------------------------------------------------------------------------------------------------------------------------------------------------------------------------------------------------------------------------------------------------------------------------------------------------------------------------------------------------------------------------------------------------------------------------------------------|-------------------------------------------------------------------------------------------------------------------------------------------------------------------------------------------------------------------------------------------------------------------------------------------------------------------------------------------------------------------------------------------------------|
| <b>Alcohol Dependence</b> | <b>DISC 2.3 and DIS-IV</b> | <ul style="list-style-type: none"> <li>• The DIS-IV includes a criterion to assess impairment (drinking caused problems for you with family, friends, or work)</li> <li>• The DISC 2.3 includes an additional symptom under Criterion A (part 4): frequent intoxication or withdrawal symptoms when expected to fulfill major role obligations (e.g., does not go to work because hung over, goes to school or work “high,” intoxicated while taking care of his/her children) or when substance use is physically hazardous (e.g., drives when intoxicated)</li> <li>• The DISC 2.3 requires that symptoms have persisted for at least 1 month within the past 6 months; the DIS-IV requires that symptoms have occurred in the same 12-month period</li> </ul> | <ul style="list-style-type: none"> <li>• Comparisons were made with and without impairment</li> <li>• To approximate impairment using the DISC 2.3, required participants to meet Criterion A part 4 (which is similar to impairment criterion in DIS-IV)</li> <li>• Unable to adjust for differences in timeframe</li> </ul>                                                                         |
| <b>Alcohol Abuse</b>      | <b>DISC 2.3 and DIS-IV</b> | <ul style="list-style-type: none"> <li>• The DIS-IV includes 2 questions (recurrent alcohol related legal problems and traffic accident under the influence of alcohol)</li> <li>• The DISC 2.3 includes 2 symptoms (gets depressed and blackouts)</li> <li>• The DISC 2.3 excludes those who meet criteria for dependence, while the DIS-IV does not exclude those who also meet dependence criteria</li> <li>• The DISC 2.3 requires that symptoms have persisted for at least 1 month within the past 6 months; the DIS-IV requires that symptoms have occurred in the same 12-month period</li> </ul>                                                                                                                                                        | <ul style="list-style-type: none"> <li>• Ignored 2 symptoms in the DIS-IV (recurrent alcohol-related legal problems and traffic accident under the influence of alcohol)</li> <li>• Ignored 2 symptoms in the DISC 2.3 (gets depressed and blackouts)</li> <li>• Disabled DISC 2.3 exclusion of those meeting dependence criteria</li> <li>• Unable to adjust for differences in timeframe</li> </ul> |

| Disorder                    | Measures                   | Differences Between Measures                                                                                                                                                                                                                                                                                                                                                                                                                                                                                                                                                                                                                                                                                                                                                                                                                                                                                                                       | Changes to Scoring Algorithms <sup>1</sup>                                                                                                                                                                                                                                                                                                       |
|-----------------------------|----------------------------|----------------------------------------------------------------------------------------------------------------------------------------------------------------------------------------------------------------------------------------------------------------------------------------------------------------------------------------------------------------------------------------------------------------------------------------------------------------------------------------------------------------------------------------------------------------------------------------------------------------------------------------------------------------------------------------------------------------------------------------------------------------------------------------------------------------------------------------------------------------------------------------------------------------------------------------------------|--------------------------------------------------------------------------------------------------------------------------------------------------------------------------------------------------------------------------------------------------------------------------------------------------------------------------------------------------|
| <b>Marijuana Dependence</b> | <b>DISC 2.3 and DIS-IV</b> | <ul style="list-style-type: none"> <li>• Impairment in the DIS-IV requires the endorsement of 1 of 3 criteria: marijuana use caused problems including physical fights or verbal fights; police stopped or arrested you more than 1 time for drug-related problems; marijuana use caused problems at work/school/home</li> <li>• The DISC 2.3 includes an additional symptom under Criterion A (part 4): frequent intoxication or withdrawal symptoms when expected to fulfill major role obligation at work, school, or home (e.g., does not go to work because hung over, goes to school or work "high," intoxicated while taking care of his or her children) or when substance use is physically hazardous (e.g., drives when intoxicated)</li> <li>• The DISC 2.3 requires that symptoms have persisted for at least 1 month within the past 6 months; the DIS-IV requires that symptoms have occurred in the same 12-month period</li> </ul> | <ul style="list-style-type: none"> <li>• Comparisons were made with and without impairment</li> <li>• To approximate impairment using the DISC 2.3, required participants to meet Criterion A part 4 (which is similar to impairment criterion in DIS-IV)</li> <li>• Unable to adjust for differences in timeframe</li> </ul>                    |
| <b>Marijuana Abuse</b>      | <b>DISC 2.3 and DIS-IV</b> | <ul style="list-style-type: none"> <li>• The DIS-IV includes a question about being arrested for marijuana use</li> <li>• The DISC 2.3 includes a question about getting sad, depressed, or irritable</li> <li>• The DISC 2.3 excludes those who meet criteria for dependence, while the DIS-IV includes those who also meet dependence criteria</li> <li>• The DISC 2.3 requires that symptoms have persisted for at least 1 month within the past 6 months; the DIS-IV requires that symptoms have occurred in the same 12-month period</li> </ul>                                                                                                                                                                                                                                                                                                                                                                                               | <ul style="list-style-type: none"> <li>• Ignored 1 symptom in the DIS-IV (recurrent substance-related problems)</li> <li>• Ignored 1 symptom in the DISC 2.3 (gets sad, depressed, or irritable)</li> <li>• Disabled DISC 2.3 exclusion of those meeting dependence criteria</li> <li>• Unable to adjust for differences in timeframe</li> </ul> |

| Disorder                          | Measures                   | Differences Between Measures                                                                                                                                                                                                                                                                                                                                                                                                                                                                                                                                                                                                                                                                                                                                                                                                                                                                                                                       | Changes to Scoring Algorithms <sup>1</sup>                                                                                                                                                                                                                                                                                           |
|-----------------------------------|----------------------------|----------------------------------------------------------------------------------------------------------------------------------------------------------------------------------------------------------------------------------------------------------------------------------------------------------------------------------------------------------------------------------------------------------------------------------------------------------------------------------------------------------------------------------------------------------------------------------------------------------------------------------------------------------------------------------------------------------------------------------------------------------------------------------------------------------------------------------------------------------------------------------------------------------------------------------------------------|--------------------------------------------------------------------------------------------------------------------------------------------------------------------------------------------------------------------------------------------------------------------------------------------------------------------------------------|
| <b>Other Substance Dependence</b> | <b>DISC 2.3 and DIS-IV</b> | <ul style="list-style-type: none"> <li>• Impairment in the DIS-IV requires the endorsement of 1 of 3 criteria: marijuana use caused problems including physical fights or verbal fights; police stopped or arrested you more than 1 time for drug-related problems; marijuana use caused problems at work/school/home</li> <li>• The DISC 2.3 includes an additional symptom under Criterion A (part 4): frequent intoxication or withdrawal symptoms when expected to fulfill major role obligation at work, school, or home (e.g., does not go to work because hung over, goes to school or work "high," intoxicated while taking care of his or her children) or when substance use is physically hazardous (e.g., drives when intoxicated)</li> <li>• The DISC 2.3 requires that symptoms have persisted for at least 1 month within the past 6 months; the DIS-IV requires that symptoms have occurred in the same 12-month period</li> </ul> | <ul style="list-style-type: none"> <li>• Comparisons were made with and without impairment</li> <li>• To approximate impairment using the DISC 2.3, required participants to meet Criterion A part 4 (which is similar to impairment criterion in DIS-IV)</li> <li>• Unable to adjust for differences in timeframe</li> </ul>        |
| <b>Other Substance Abuse</b>      | <b>DISC 2.3 and DIS-IV</b> | <ul style="list-style-type: none"> <li>• The DIS-IV includes a question about being arrested for substance use</li> <li>• The DISC 2.3 includes a symptom about getting sad, depressed, or irritable</li> <li>• The DISC 2.3 excludes those who meet criteria for dependence, while the DIS-IV includes those who also meet dependence criteria</li> <li>• The DISC 2.3 requires that symptoms have persisted for at least 1 month within the past 6 months; the DIS-IV requires that symptoms have occurred in the same 12-month period</li> </ul>                                                                                                                                                                                                                                                                                                                                                                                                | <ul style="list-style-type: none"> <li>• Ignored 1 symptom in the DIS-IV (arrest for substance use)</li> <li>• Ignored 1 symptom in the DISC 2.3 (gets sad, depressed, or irritable)</li> <li>• Disabled DISC 2.3 exclusion of those meeting dependence criteria</li> <li>• Unable to adjust for differences in timeframe</li> </ul> |

**eTable 2. Prevalence of disorder at baseline, Time 1 and Time 2, by race/ethnicity in males<sup>a,b,c</sup>**

| Disorder                                                       | African American |       |        |       |        |       | Hispanic |       |        |       |        |       | Non-Hispanic white |       |        |       |        |       |
|----------------------------------------------------------------|------------------|-------|--------|-------|--------|-------|----------|-------|--------|-------|--------|-------|--------------------|-------|--------|-------|--------|-------|
|                                                                | Baseline         |       | Time 1 |       | Time 2 |       | Baseline |       | Time 1 |       | Time 2 |       | Baseline           |       | Time 1 |       | Time 2 |       |
|                                                                | %                | (SE)  | %      | (SE)  | %      | (SE)  | %        | (SE)  | %      | (SE)  | %      | (SE)  | %                  | (SE)  | %      | (SE)  | %      | (SE)  |
| <b>Any Disorder<sup>d</sup></b>                                | 59.7             | (5.1) | 49.6   | (3.4) | 44.3   | (3.5) | 65.6     | (6.8) | 56.6   | (4.5) | 49.8   | (4.6) | 79.4               | (3.9) | 64.3   | (3.8) | 63.9   | (3.9) |
| <b>Any Disorder, Except Behavioral<sup>d</sup></b>             | 58.8             | (5.1) | 43.8   | (3.4) | 34.2   | (3.3) | 62.5     | (6.8) | 47.9   | (4.3) | 41.9   | (4.3) | 72.7               | (4.3) | 52.6   | (4.0) | 56.2   | (4.1) |
| Schizophrenia <sup>e</sup>                                     | ---              | ---   | 0.0    | ---   | 0.0    | ---   | ---      | ---   | 0.9    | (0.6) | 0.4    | (0.4) | ---                | ---   | 0.6    | (0.6) | 0.7    | (0.7) |
| <b>Any Mood Disorder</b>                                       | 15.4             | (2.2) | 15.3   | (2.4) | 9.0    | (2.0) | 18.9     | (3.6) | 13.5   | (2.2) | 7.5    | (1.7) | 12.3               | (2.4) | 11.3   | (2.5) | 7.3    | (2.1) |
| <b>Any Major Mood Disorder</b>                                 | 12.4             | (2.0) | 9.3    | (1.9) | 6.7    | (1.7) | 15.4     | (3.5) | 10.5   | (1.9) | 5.8    | (1.5) | 9.5                | (2.2) | 8.4    | (2.2) | 4.6    | (1.7) |
| Mania                                                          | 2.3              | (0.9) | 0.2    | (0.1) | 0.5    | (0.5) | 1.3      | (0.6) | 2.0    | (0.9) | 1.7    | (0.8) | 0.0                | ---   | 0.6    | (0.6) | 0.0    | ---   |
| Major depression                                               | 10.5             | (1.9) | 9.1    | (1.9) | 6.7    | (1.7) | 14.6     | (3.5) | 9.2    | (1.8) | 5.8    | (1.5) | 9.5                | (2.2) | 7.6    | (2.1) | 4.6    | (1.7) |
| Hypomania                                                      | 1.9              | (0.8) | 6.9    | (1.7) | 2.1    | (0.9) | 3.4      | (2.1) | 4.3    | (1.2) | 2.0    | (0.9) | 1.0                | (0.6) | 3.3    | (1.5) | 3.3    | (1.5) |
| Dysthymia                                                      | 9.7              | (1.8) | 1.1    | (0.7) | 1.0    | (0.7) | 11.3     | (3.0) | 0.9    | (0.6) | 0.0    | ---   | 8.4                | (2.0) | 0.9    | (0.7) | 0.7    | (0.7) |
| <b>Any Anxiety Disorder<sup>d</sup></b>                        | 9.1              | (3.2) | 8.7    | (1.9) | 8.0    | (2.0) | 18.6     | (5.9) | 16.1   | (3.2) | 6.8    | (1.7) | 9.8                | (3.0) | 7.8    | (2.2) | 6.0    | (2.1) |
| Generalized anxiety disorder                                   | 3.7              | (1.2) | 2.7    | (1.2) | 2.2    | (1.1) | 5.0      | (2.2) | 2.4    | (1.0) | 0.5    | (0.5) | 2.0                | (1.0) | 1.7    | (1.0) | 0.8    | (0.8) |
| Panic disorder                                                 | 0.0              | (0.0) | 0.8    | (0.5) | 0.1    | (0.1) | 0.3      | (0.3) | 4.0    | (1.2) | 1.6    | (0.8) | 0.5                | (0.5) | 3.0    | (1.4) | 2.3    | (1.3) |
| Post-traumatic stress disorder <sup>d</sup>                    | 6.2              | (2.7) | 6.7    | (1.6) | 5.6    | (1.6) | 16.0     | (5.9) | 13.1   | (2.9) | 5.6    | (1.5) | 7.0                | (2.6) | 3.8    | (1.5) | 2.6    | (1.3) |
| Attention-deficit/hyperactivity disorder (< 18 y) <sup>f</sup> | 11.6             | (1.9) | 5.0    | (2.6) | 4.4    | (2.6) | 8.1      | (1.5) | 8.2    | (3.8) | 3.8    | (3.8) | 16.1               | (2.7) | 13.8   | (7.0) | ---    | ---   |
| <b>Any Disruptive Behavior Disorder<sup>g</sup></b>            | 26.7             | (2.7) | 19.9   | (2.6) | 21.2   | (2.9) | 35.5     | (3.7) | 26.9   | (3.5) | 22.8   | (4.0) | 52.8               | (3.6) | 34.6   | (3.8) | 31.1   | (4.0) |
| Conduct disorder (< 18 y) <sup>f</sup>                         | 20.6             | (2.5) | 15.3   | (4.1) | 8.2    | (3.7) | 33.3     | (3.7) | 43.7   | (9.2) | 18.4   | (7.7) | 51.6               | (3.6) | 32.8   | (8.7) | ---    | ---   |
| Oppositional defiant disorder (< 18 y) <sup>f</sup>            | 12.6             | (2.0) | 16.3   | (4.6) | 11.0   | (4.1) | 12.2     | (2.5) | 13.4   | (4.3) | 6.9    | (4.8) | 16.3               | (2.6) | 15.6   | (6.9) | ---    | ---   |
| Antisocial personality disorder (>= 18 y) <sup>h</sup>         | NA               | NA    | 18.9   | (3.0) | 21.3   | (3.0) | NA       | NA    | 22.4   | (3.2) | 22.9   | (4.1) | NA                 | NA    | 33.0   | (4.1) | 31.7   | (4.1) |
| <b>Any Substance Use Disorder</b>                              | 44.2             | (3.0) | 26.4   | (2.9) | 25.4   | (2.9) | 49.7     | (3.9) | 38.2   | (4.0) | 34.2   | (4.0) | 58.0               | (3.5) | 41.5   | (3.8) | 46.9   | (4.0) |
| Alcohol use disorder                                           | 19.8             | (2.5) | 14.5   | (2.3) | 15.7   | (2.5) | 20.2     | (2.9) | 17.9   | (2.5) | 19.9   | (2.7) | 23.2               | (3.1) | 25.3   | (3.3) | 27.9   | (3.6) |
| Drug use disorder                                              | 41.5             | (3.0) | 19.3   | (2.6) | 16.7   | (2.5) | 43.2     | (3.8) | 30.4   | (3.9) | 23.5   | (3.8) | 54.6               | (3.5) | 31.5   | (3.6) | 33.8   | (3.8) |

SE = Standard error; y = years; NA = Not applicable

<sup>a</sup> Descriptive statistics are weighted to adjust for sampling design and reflect the demographic characteristics of the Cook County Juvenile Temporary Detention Center.

<sup>b</sup> Because some participants were interviewed more often than others, we used a subset of interviews to summarize prevalence rates at 3 time points: baseline (Time 0), Time 1 and Time 2. The sample consisted of: 575 African American, 207 non-Hispanic white, and 387 Hispanic males at baseline; 526 African American, 184 non-Hispanic white, and 341 Hispanic males at Time 1; 505 African American, 171 non-Hispanic white, and 315 Hispanic males at Time 2. Three males who identified as "other" race/ethnicity are excluded from the table.

<sup>c</sup> Prevalence rates are for disorders assessed with impairment criteria, with the exception of hypomania, which has no impairment criteria for diagnosis.

<sup>d</sup> Assessed at baseline for participants who were interviewed after the *DISC-IV* post-traumatic stress disorder module became available (n = 251 African American, 107 non-Hispanic white, and 182 Hispanic males).

<sup>e</sup> Not assessed at baseline.

<sup>f</sup> Assessed for participants younger than 18 years old (575 African American, 207 non-Hispanic white, and 387 Hispanic males at baseline; 200 African American, 40 non-Hispanic white, and 108 Hispanic males at Time 1; 59 African American, 10 non-Hispanic white, and 27 Hispanic males at Time 2). We do not present prevalence rates for cells with fewer than 20 participants.

<sup>g</sup> For participants younger than 18, Any Disruptive Behavior Disorder is defined as having conduct disorder or oppositional defiant disorder. For participants 18 and older, it is defined as having antisocial personality disorder.

<sup>h</sup> Assessed for participants 18 and older at Time 1 and Time 2 (326 African American, 144 non-Hispanic white, and 233 Hispanic males at Time 1; 446 African American, 161 non-Hispanic white, and 288 Hispanic males at Time 2). Not assessed at baseline because the sample consisted of juveniles.

eTable 3. Prevalence of disorder at baseline, Time 1 and Time 2, by race/ethnicity in females<sup>a,b,c</sup>

| Disorder                                                       | African American |       |        |       |        |       | Hispanic |       |        |       |        |       | Non-Hispanic white |       |        |       |        |       |
|----------------------------------------------------------------|------------------|-------|--------|-------|--------|-------|----------|-------|--------|-------|--------|-------|--------------------|-------|--------|-------|--------|-------|
|                                                                | Baseline         |       | Time 1 |       | Time 2 |       | Baseline |       | Time 1 |       | Time 2 |       | Baseline           |       | Time 1 |       | Time 2 |       |
|                                                                | %                | (SE)  | %      | (SE)  | %      | (SE)  | %        | (SE)  | %      | (SE)  | %      | (SE)  | %                  | (SE)  | %      | (SE)  | %      | (SE)  |
| <b>Any Disorder<sup>d</sup></b>                                | 60.5             | (3.2) | 38.6   | (2.6) | 27.8   | (2.4) | 73.8     | (5.2) | 49.0   | (5.0) | 35.0   | (4.9) | 73.7               | (6.6) | 54.0   | (6.0) | 34.8   | (6.2) |
| <b>Any Disorder, Except Behavioral<sup>d</sup></b>             | 57.4             | (3.2) | 33.7   | (2.5) | 24.0   | (2.3) | 68.3     | (5.5) | 45.0   | (5.0) | 28.6   | (4.6) | 67.3               | (7.0) | 52.5   | (6.0) | 34.8   | (6.2) |
| Schizophrenia <sup>e</sup>                                     | ---              | ---   | 0.3    | (0.3) | 0.0    | ---   | ---      | ---   | 0.0    | ---   | 0.0    | ---   | ---                | ---   | 0.0    | ---   | 0.0    | ---   |
| <b>Any Mood Disorder</b>                                       | 20.4             | (1.9) | 17.2   | (1.9) | 11.9   | (1.7) | 24.2     | (3.7) | 18.3   | (3.6) | 14.6   | (3.5) | 23.4               | (4.5) | 16.9   | (4.3) | 10.7   | (3.9) |
| <b>Any Major Mood Disorder</b>                                 | 17.7             | (1.8) | 12.6   | (1.7) | 10.6   | (1.6) | 20.3     | (3.4) | 16.7   | (3.5) | 12.2   | (3.2) | 20.1               | (4.3) | 13.8   | (3.9) | 8.6    | (3.4) |
| Mania                                                          | 1.2              | (0.5) | 2.0    | (0.7) | 1.3    | (0.6) | 1.4      | (1.0) | 0.7    | (0.7) | 2.7    | (1.5) | 1.1                | (1.1) | 0.0    | ---   | 1.4    | (1.4) |
| Major depression                                               | 16.7             | (1.8) | 12.0   | (1.6) | 10.6   | (1.6) | 19.7     | (3.4) | 16.5   | (3.5) | 11.2   | (3.1) | 19.0               | (4.2) | 13.8   | (3.9) | 8.4    | (3.3) |
| Hypomania                                                      | 0.2              | (0.2) | 4.3    | (1.0) | 0.5    | (0.4) | 0.7      | (0.7) | 2.6    | (1.5) | 1.8    | (1.3) | 0.0                | ---   | 6.0    | (2.6) | 1.4    | (1.4) |
| Dysthymia                                                      | 11.3             | (1.5) | 1.8    | (0.7) | 0.5    | (0.4) | 15.8     | (3.1) | 0.8    | (0.8) | 0.9    | (0.9) | 17.9               | (4.1) | 1.3    | (1.3) | 1.5    | (1.5) |
| <b>Any Anxiety Disorder<sup>d</sup></b>                        | 14.2             | (2.3) | 12.9   | (1.8) | 8.2    | (1.5) | 27.1     | (5.1) | 16.1   | (3.6) | 10.7   | (3.2) | 8.6                | (4.1) | 4.6    | (2.6) | 5.3    | (3.0) |
| Generalized anxiety disorder                                   | 4.7              | (1.0) | 3.1    | (0.9) | 2.3    | (0.8) | 8.5      | (2.4) | 5.6    | (2.2) | 3.3    | (1.9) | 3.3                | (1.9) | 1.5    | (1.5) | 0.0    | ---   |
| Panic disorder                                                 | 0.7              | (0.4) | 2.2    | (0.8) | 0.6    | (0.4) | 2.1      | (1.2) | 4.6    | (2.0) | 2.2    | (1.6) | 1.1                | (1.1) | 0.0    | ---   | 1.8    | (1.8) |
| Post-traumatic stress disorder <sup>d</sup>                    | 10.6             | (2.0) | 8.8    | (1.4) | 6.1    | (1.2) | 16.8     | (4.3) | 7.6    | (2.5) | 7.6    | (2.6) | 8.6                | (4.1) | 3.6    | (2.1) | 2.8    | (2.0) |
| Attention-deficit/hyperactivity disorder (< 18 y) <sup>f</sup> | 15.8             | (1.8) | 9.7    | (3.1) | ---    | ---   | 20.5     | (3.5) | 3.7    | (3.7) | ---    | ---   | 16.6               | (3.9) | ---    | ---   | ---    | ---   |
| <b>Any Disruptive Behavior Disorder<sup>g</sup></b>            | 27.7             | (2.2) | 14.3   | (1.8) | 5.8    | (1.3) | 44.9     | (4.3) | 19.2   | (3.7) | 14.5   | (3.6) | 54.4               | (5.3) | 13.8   | (4.1) | 8.7    | (3.8) |
| Conduct disorder (< 18 y) <sup>f</sup>                         | 22.0             | (2.0) | 13.8   | (3.6) | ---    | ---   | 35.9     | (4.1) | 7.5    | (5.1) | ---    | ---   | 49.9               | (5.4) | ---    | ---   | ---    | ---   |
| Oppositional defiant disorder (< 18 y) <sup>f</sup>            | 13.7             | (1.7) | 10.1   | (3.0) | ---    | ---   | 21.0     | (3.5) | 6.0    | (4.2) | ---    | ---   | 17.8               | (4.1) | ---    | ---   | ---    | ---   |
| Antisocial personality disorder (>= 18 y) <sup>h</sup>         | NA               | NA    | 12.0   | (1.9) | 6.0    | (1.3) | NA       | NA    | 20.4   | (4.3) | 14.1   | (3.7) | NA                 | NA    | 11.6   | (4.1) | 7.2    | (3.5) |
| <b>Any Substance Use Disorder</b>                              | 36.3             | (2.3) | 12.9   | (1.7) | 12.1   | (1.7) | 45.8     | (4.4) | 20.5   | (3.7) | 14.8   | (3.4) | 59.6               | (5.3) | 35.8   | (5.4) | 23.7   | (5.1) |
| Alcohol use disorder                                           | 15.3             | (1.8) | 5.7    | (1.2) | 6.0    | (1.2) | 25.7     | (3.8) | 12.9   | (3.0) | 7.3    | (2.5) | 30.1               | (5.0) | 15.6   | (4.0) | 5.6    | (2.7) |
| Drug use disorder                                              | 33.0             | (2.3) | 8.9    | (1.4) | 6.8    | (1.3) | 41.7     | (4.3) | 11.7   | (2.9) | 13.9   | (3.3) | 56.7               | (5.3) | 25.6   | (5.0) | 20.9   | (4.8) |

SE = Standard error; y = years; NA = Not applicable



- <sup>a</sup> Descriptive statistics are weighted to adjust for sampling design and reflect the demographic characteristics of the Cook County Juvenile Temporary Detention Center.
- <sup>b</sup> Because some participants were interviewed more often than others, we used a subset of interviews to summarize prevalence rates at 3 time points: baseline (Time 0), Time 1 and Time 2. The sample consisted of: 430 African American, 89 non-Hispanic white, and 137 Hispanic females at baseline; 401 African American, 83 non-Hispanic white, and 120 Hispanic females at Time 1; 388 African American, 71 non-Hispanic white, and 108 Hispanic females at Time 2. One female who identified as "other" race/ethnicity is excluded from the table.
- <sup>c</sup> Prevalence rates are for disorders assessed with impairment criteria, with the exception of hypomania, which has no impairment criteria for diagnosis.
- <sup>d</sup> Assessed at baseline for participants who were interviewed after the *DISC-IV* post-traumatic stress disorder module became available (n = 249 African American, 48 non-Hispanic white, and 76 Hispanic females).
- <sup>e</sup> Not assessed at baseline.
- <sup>f</sup> Assessed for participants younger than 18 years (430 African American, 89 non-Hispanic white, and 137 Hispanic females at baseline; 101 African American, 15 non-Hispanic white, and 32 Hispanic females at Time 1; 15 African American, 2 non-Hispanic white, and 4 Hispanic females at Time 2). We do not estimate prevalence rates for cells with fewer than 20 participants.
- <sup>g</sup> For participants younger than 18, Any Disruptive Behavior Disorder is defined as having conduct disorder or oppositional defiant disorder. For participants 18 and older, it is defined as having antisocial personality disorder.
- <sup>h</sup> Assessed for participants 18 and older at Time 1 and Time 2 (300 African American, 68 non-Hispanic white, and 88 Hispanic females at Time 1; 373 African American, 69 non-Hispanic white, and 104 Hispanic females at Time 2). Not assessed at baseline because the sample consisted of juveniles.

**eTable 4. Prevalence of substance use disorders among participants living in the community at Time 2<sup>a,b</sup>**

| Males                             |               |      |      |      |                                                       |              |       |        |              | Sex Differences,<br>OR (95% CI) |              |  |
|-----------------------------------|---------------|------|------|------|-------------------------------------------------------|--------------|-------|--------|--------------|---------------------------------|--------------|--|
| Disorder                          | Prevalence, % |      |      |      | Racial/Ethnic Differences, OR (95% CI) <sup>c,d</sup> |              |       |        |              |                                 |              |  |
|                                   | All           | AA   | H    | W    | W v AA                                                |              | W v H | H v AA |              | M vs F                          |              |  |
| <b>Any Substance Use Disorder</b> | 33.7          | 27.3 | 49.6 | 52.3 | 2.93                                                  | (1.44, 5.93) |       | 2.63   | (1.20, 5.74) | 3.55                            | (2.22, 5.69) |  |
| Alcohol use disorder              | 16.5          | 12.1 | 27.0 | 30.4 | 3.17                                                  | (1.29, 7.79) |       | 2.68   | (1.06, 6.79) | 3.45                            | (1.89, 6.29) |  |
| Drug use disorder                 | 24.0          | 18.9 | 36.5 | 38.3 | 2.66                                                  | (1.22, 5.79) |       | 2.46   | (1.04, 5.85) | 3.24                            | (1.92, 5.45) |  |
| Females                           |               |      |      |      |                                                       |              |       |        |              |                                 |              |  |
| Disorder                          | Prevalence, % |      |      |      | Racial/Ethnic Differences, OR (95% CI) <sup>d,e</sup> |              |       |        |              |                                 |              |  |
|                                   | All           | AA   | H    | W    | W v AA                                                |              | W v H | H v AA |              |                                 |              |  |
| <b>Any Substance Use Disorder</b> | 12.5          | 10.8 | 14.1 | 23.7 | 2.55                                                  | (1.31, 4.98) |       |        |              |                                 |              |  |
| Alcohol use disorder              | 5.4           | 5.3  | 6.4  | 5.9  |                                                       |              |       |        |              |                                 |              |  |
| Drug use disorder                 | 8.9           | 6.4  | 13.0 | 20.7 | 3.83                                                  | (1.82, 8.10) |       | 2.20   | (1.02, 4.70) |                                 |              |  |

AA = African American; H = Hispanic; W = non-Hispanic white; M = Male; F = Female; OR = Odds Ratio; CI = Confidence Interval

<sup>a</sup> Descriptive and inferential statistics are weighted to adjust for sampling design and reflect the demographic characteristics of the Cook County Juvenile Temporary Detention Center.

<sup>b</sup> Includes only participants who lived in the community the *entire year* prior to Time 2 (n = 345 males, 479 females).

<sup>c</sup> For males, racial/ethnic differences compare 137 African Americans, 114 Hispanics, and 93 non-Hispanic whites who lived in the community the entire year prior to Time 2. One male who self-identified as "other" was excluded from racial/ethnic comparisons.

<sup>d</sup> We estimated specific differences (e.g. non-Hispanic white versus African American) only when the overall effect for race/ethnicity was statistically significant with p < 0.05.

<sup>e</sup> For females, racial/ethnic differences compare 319 African Americans, 92 Hispanics, and 67 non-Hispanic whites who lived in the community the entire year prior to Time 2. One female who self-identified as "other" was excluded from racial/ethnic comparisons.

**eTable 5. Persistence of disorders from baseline to Time 1 and from baseline to Time 2, by race/ethnicity in males<sup>a,b</sup>**

| Disorder                                    | African American                       |              |           | Hispanic                               |              |           | Non-Hispanic white                     |              |           | OR (95% CI)<br>for<br>Persistence to<br>Time 1 <sup>c</sup> | OR (95% CI)<br>for<br>Persistence to<br>Time 2 <sup>c</sup> |
|---------------------------------------------|----------------------------------------|--------------|-----------|----------------------------------------|--------------|-----------|----------------------------------------|--------------|-----------|-------------------------------------------------------------|-------------------------------------------------------------|
|                                             | Disorder<br>Present at<br>Baseline (n) | % Persisting |           | Disorder<br>Present at<br>Baseline (n) | % Persisting |           | Disorder<br>Present at<br>Baseline (n) | % Persisting |           |                                                             |                                                             |
|                                             |                                        | Time<br>1    | Time<br>2 |                                        | Time<br>1    | Time<br>2 |                                        | Time<br>1    | Time<br>2 |                                                             |                                                             |
| <b>Any Mood Disorder</b>                    | 82                                     | 26.4         | 19.2      | 57                                     | 34.0         | 18.3      | 24                                     | 31.4         | 16.6      |                                                             |                                                             |
| <b>Any Major Mood Disorder</b>              | 65                                     | 16.0         | 17.3      | 44                                     | 31.1         | 16.8      | 18                                     | ---          | ---       |                                                             |                                                             |
| Mania                                       | 9                                      | ---          | ---       | 7                                      | ---          | ---       | 0                                      | ---          | ---       |                                                             |                                                             |
| Major depression                            | 57                                     | 18.4         | 15.9      | 41                                     | 26.3         | 13.8      | 18                                     | ---          | ---       |                                                             |                                                             |
| Hypomania                                   | 8                                      | ---          | ---       | 5                                      | ---          | ---       | 3                                      | ---          | ---       |                                                             |                                                             |
| Dysthymia                                   | 48                                     | 0.4          | 0.0       | 34                                     | 8.8          | 0.0       | 16                                     | ---          | ---       |                                                             |                                                             |
| <b>Any Anxiety Disorder<sup>d</sup></b>     | 18                                     | ---          | ---       | 22                                     | 20.6         | 14.9      | 10                                     | ---          | ---       |                                                             |                                                             |
| Generalized anxiety disorder                | 16                                     | ---          | ---       | 14                                     | ---          | ---       | 4                                      | ---          | ---       |                                                             |                                                             |
| Panic disorder                              | 1                                      | ---          | ---       | 1                                      | ---          | ---       | 1                                      | ---          | ---       |                                                             |                                                             |
| Post-traumatic stress disorder <sup>d</sup> | 12                                     | ---          | ---       | 18                                     | ---          | ---       | 7                                      | ---          | ---       |                                                             |                                                             |
| <b>Any Disruptive Behavior Disorder</b>     | 140                                    | 34.0         | 29.5      | 141                                    | 42.0         | 35.3      | 106                                    | 41.0         | 34.4      |                                                             |                                                             |
| <b>Any Substance Use Disorder</b>           | 227                                    | 35.4         | 31.9      | 178                                    | 45.4         | 37.0      | 112                                    | 50.0         | 53.9      |                                                             |                                                             |
| Alcohol use disorder                        | 92                                     | 29.9         | 29.1      | 82                                     | 25.4         | 26.2      | 45                                     | 50.5         | 40.8      |                                                             |                                                             |
| Drug use disorder                           | 214                                    | 24.9         | 20.8      | 163                                    | 41.1         | 27.3      | 105                                    | 37.6         | 39.5      |                                                             |                                                             |

OR = Odds ratio; CI = Confidence interval

--- Rates of persistence are not presented for disorders with fewer than 20 cases at baseline.

<sup>a</sup> Descriptive and inferential statistics are weighted to adjust for sampling design and reflect the demographic characteristics of the Cook County Juvenile Temporary Detention Center.

<sup>b</sup> Persistence is presented for disorders assessed with impairment criteria, with the exception of hypomania, which has no impairment criteria for diagnosis. We do not present rates of persistence for disorders assessed only for juveniles or adults (Attention-deficit/hyperactivity disorder, conduct disorder, oppositional defiant disorder, or antisocial personality disorder).

<sup>c</sup> There were no significant racial/ethnic differences in persistence among males. Odds ratios contrasting racial/ethnic differences in the persistence of substance use disorders were adjusted for number of days incarcerated in the past year.

<sup>d</sup> Assessed at baseline for participants who were interviewed after the DISC-IV post-traumatic stress disorder module became available (n = 251 African American, 107 non-Hispanic white, and 182 Hispanic males).

**eTable 6. Persistence of disorders from baseline to Time 1 and from baseline to Time 2, by race/ethnicity in females<sup>a,b</sup>**

| Disorder                                    | African American                 |              |        | Hispanic                         |              |        | Non-Hispanic white               |              |        | OR (95% CI) for Persistence to Time 1 <sup>c</sup> | OR (95% CI) for Persistence to Time 2 <sup>c</sup> |
|---------------------------------------------|----------------------------------|--------------|--------|----------------------------------|--------------|--------|----------------------------------|--------------|--------|----------------------------------------------------|----------------------------------------------------|
|                                             | Disorder Present at Baseline (n) | % Persisting |        | Disorder Present at Baseline (n) | % Persisting |        | Disorder Present at Baseline (n) | % Persisting |        |                                                    |                                                    |
|                                             |                                  | Time 1       | Time 2 |                                  | Time 1       | Time 2 |                                  | Time 1       | Time 2 |                                                    |                                                    |
| <b>Any Mood Disorder</b>                    | 88                               | 32.2         | 24.2   | 34                               | 40.5         | 26.0   | 21                               | 26.5         | 13.4   |                                                    |                                                    |
| <b>Any Major Mood Disorder</b>              | 76                               | 25.9         | 24.1   | 29                               | 41.3         | 22.1   | 18                               | ---          | ---    |                                                    |                                                    |
| Mania                                       | 5                                | ---          | ---    | 2                                | ---          | ---    | 1                                | ---          | ---    |                                                    |                                                    |
| Major depression                            | 72                               | 24.7         | 22.0   | 28                               | 41.2         | 22.9   | 17                               | ---          | ---    |                                                    |                                                    |
| Hypomania                                   | 1                                | ---          | ---    | 1                                | ---          | ---    | 0                                | ---          | ---    |                                                    |                                                    |
| Dysthymia                                   | 49                               | 4.4          | 2.4    | 22                               | 0.0          | 5.4    | 16                               | ---          | ---    |                                                    |                                                    |
| <b>Any Anxiety Disorder<sup>d</sup></b>     | 32                               | 26.9         | 24.0   | 21                               | 21.9         | 24.1   | 4                                | ---          | ---    |                                                    |                                                    |
| Generalized anxiety disorder                | 20                               | 0.0          | 7.1    | 12                               | ---          | ---    | 3                                | ---          | ---    |                                                    |                                                    |
| Panic disorder                              | 3                                | ---          | ---    | 3                                | ---          | ---    | 1                                | ---          | ---    |                                                    |                                                    |
| Post-traumatic stress disorder <sup>d</sup> | 24                               | 9.1          | 10.0   | 13                               | ---          | ---    | 4                                | ---          | ---    |                                                    |                                                    |
| <b>Any Disruptive Behavior Disorder</b>     | 119                              | 28.1         | 10.5   | 62                               | 29.3         | 14.9   | 48                               | 19.5         | 9.3    |                                                    |                                                    |
| <b>Any Substance Use Disorder</b>           | 153                              | 19.5         | 16.7   | 60                               | 35.4         | 18.0   | 52                               | 44.4         | 32.2   | 3.18 (1.57, 6.42) W v AA;                          |                                                    |
|                                             |                                  |              |        |                                  |              |        |                                  |              |        | 2.24 (1.12, 4.47) H v AA                           |                                                    |
| Alcohol use disorder                        | 65                               | 9.7          | 14.1   | 35                               | 31.1         | 10.0   | 26                               | 28.5         | 18.8   | 3.47 (1.01, 11.87) W v AA;                         |                                                    |
|                                             |                                  |              |        |                                  |              |        |                                  |              |        | 3.97 (1.28, 12.32) H v AA                          |                                                    |
| Drug use disorder                           | 140                              | 14.6         | 10.0   | 55                               | 17.8         | 20.5   | 50                               | 30.1         | 26.1   |                                                    | 2.98 (1.16,7.67) W v AA                            |

OR = Odds Ratio; CI = Confidence Interval; AA = African American; H = Hispanic; W = non-Hispanic white

--- Rates of persistence are not presented for disorders with fewer than 20 cases at baseline.

<sup>a</sup> Descriptive and inferential statistics are weighted to adjust for sampling design and reflect the demographic characteristics of the Cook County Juvenile Temporary Detention Center.

<sup>b</sup> Persistence is presented for disorders assessed with impairment criteria, with the exception of hypomania, which has no impairment criteria for diagnosis. We do not present rates of persistence for disorders assessed only for juveniles or adults (Attention-deficit/hyperactivity disorder, conduct disorder, oppositional defiant disorder, or antisocial personality disorder).

<sup>c</sup> Odds ratios contrasting racial/ethnic differences in the persistence of substance use disorders are adjusted for number of days incarcerated in the past year.

<sup>d</sup> Assessed at baseline for participants who were interviewed after the DISC-IV post-traumatic stress disorder module became available (n = 249 African American, 48 non-Hispanic white, and 76 Hispanic females).
